# Supplementary material for: Organic–inorganic hybridisation strategy for synthesizing durable colored superamphiphobic coatings
Source: Royal Society of Chemistry journal article supplement (doi:10.1039/d4mh01852d), 2025-01-01
Supplement: d4mh01852d2.pdf [file d4mh01852d2.pdf]

# **Organic-inorganic hybridisation strategy for synthesizing durable colored superamphiphobic coatings**

*Molan Guo<sup>a</sup>, Siyu Zhang<sup>a</sup>, Huayang Zhang<sup>a</sup>, Tianqi Wei<sup>a</sup>, Guangyi Tian<sup>a</sup>, Wen Si<sup>a</sup>,  
Zhiguang Guo<sup>ab\*</sup>*

<sup>a</sup> Ministry of Education Key Laboratory for the Green Preparation and Application of Functional Materials, Hubei Key Laboratory of Polymer Materials, Hubei University, Wuhan 430062, China. E-mail: [zguo@licp.cas.cn](mailto:zguo@licp.cas.cn)

<sup>b</sup> State Key Laboratory of Solid Lubrication, Lanzhou Institute of Chemical Physics, Chinese Academy of Sciences, Lanzhou 730000, China

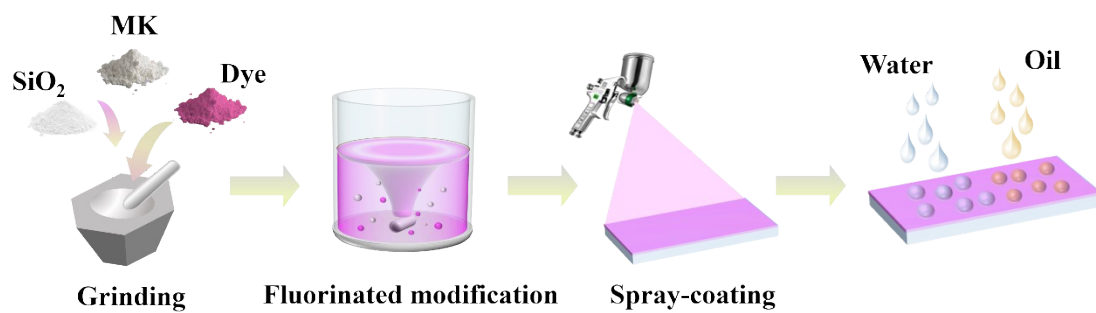

**Figure S1.** Flow chart for the preparation of superamphiphobic coatings.

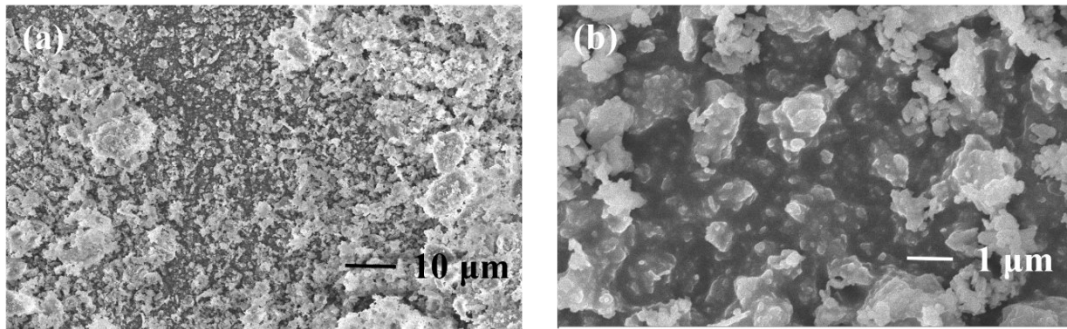

**Figure S2.** SEM images of the FMS coating magnified 1000 times and 5000 times.

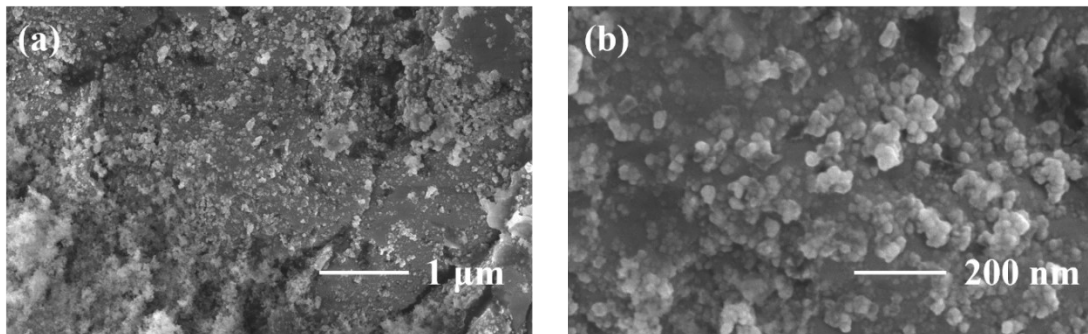

**Figure S3.** SEM images of the FSS coating magnified 10000 times and 30000 times.

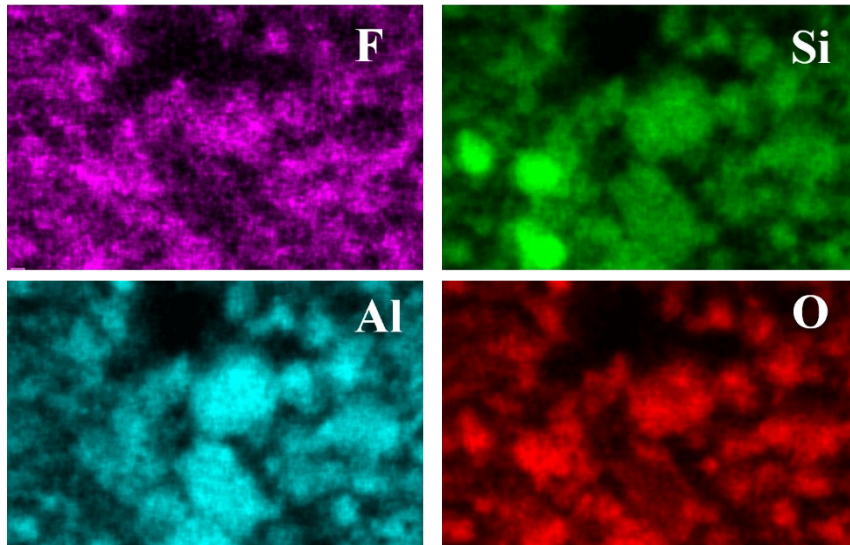

**Figure S4.** EDS image of FMSS coating.

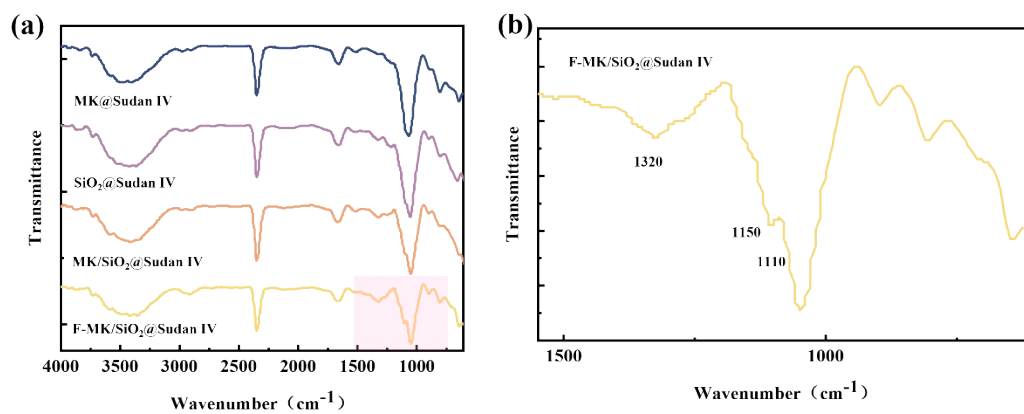

**Figure S5.** (a) FTIR spectra. (b) Partial amplification diagram of F-MK/SiO<sub>2</sub>@Sudan IV.

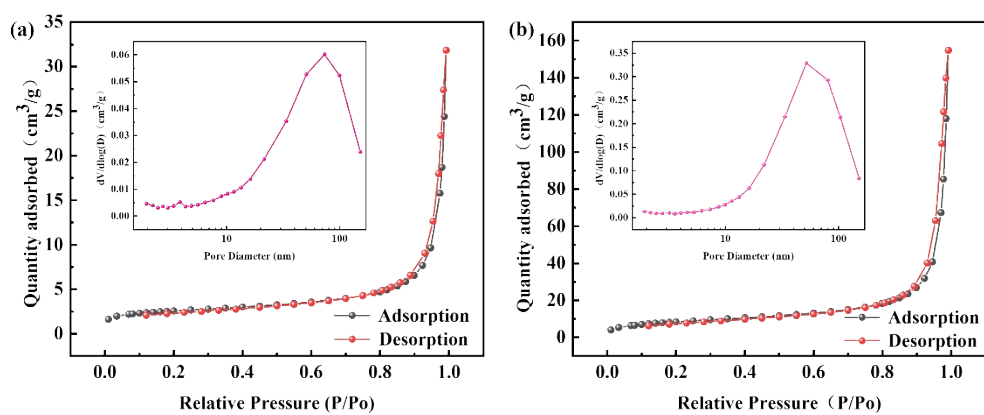

**Figure S6.** N<sub>2</sub> adsorption-desorption hysteresis curve and pore volume curve of (a) MK powder (b)FMSS powder.

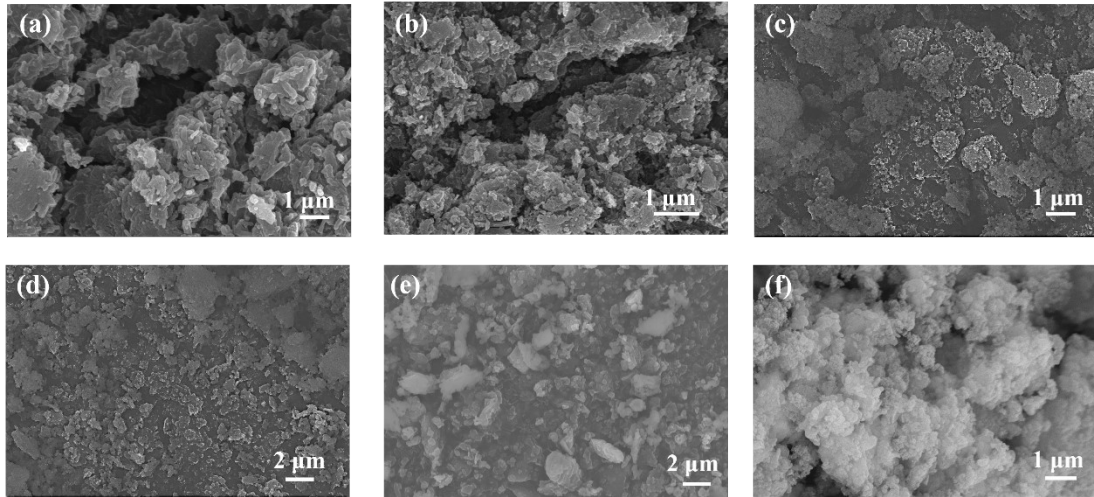

**Figure S7.** SEM images of (a)FMSS-0.1; (b)FMSS-0.2; (c) FMSS-0.3  
(d)FMSS-0.8; (e)FMSS-0.9; (f)FMSS-1.0.

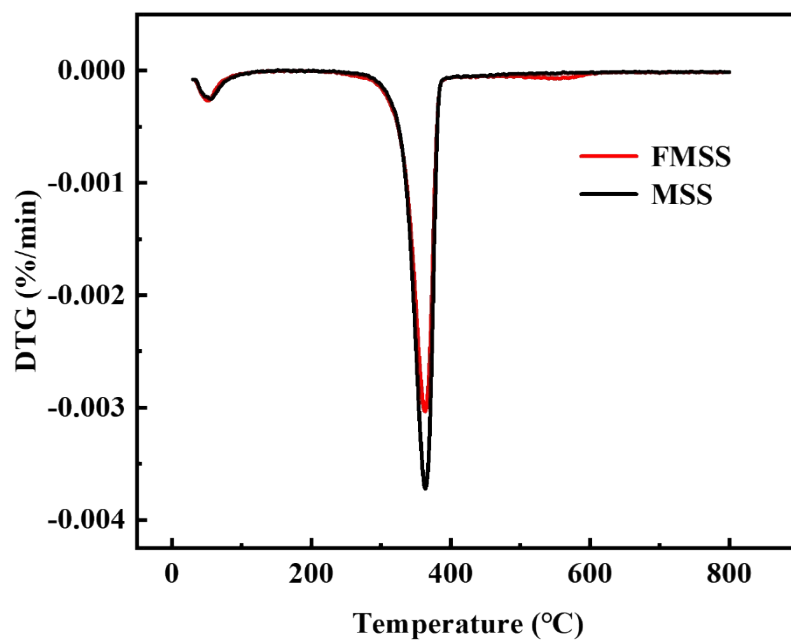

**Figure S8.** DTG curves for diverse samples of the FMSS and MSS coating.



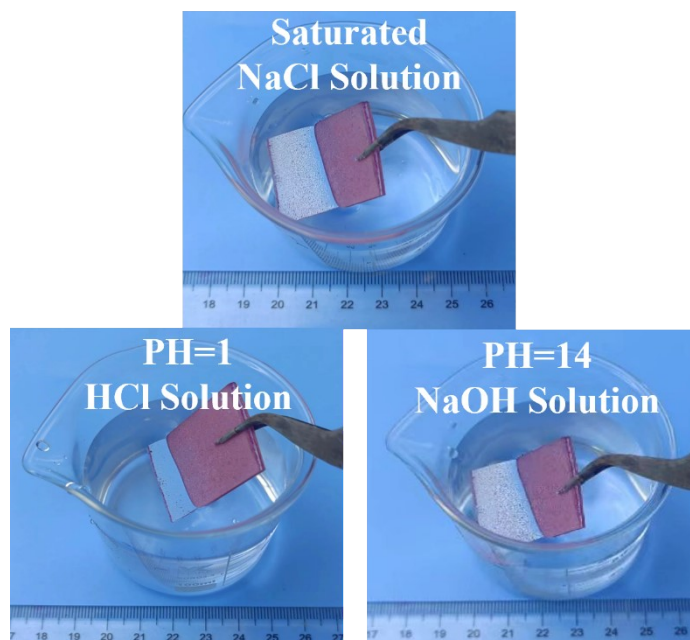

**Figure S9.** Silver mirror phenomenon of the FMSS 0.5 surface immersed in hydrochloric acid solution at  $\text{pH} = 1$ , sodium hydroxide solution at  $\text{pH} = 14$ , and saturated sodium chloride solution.

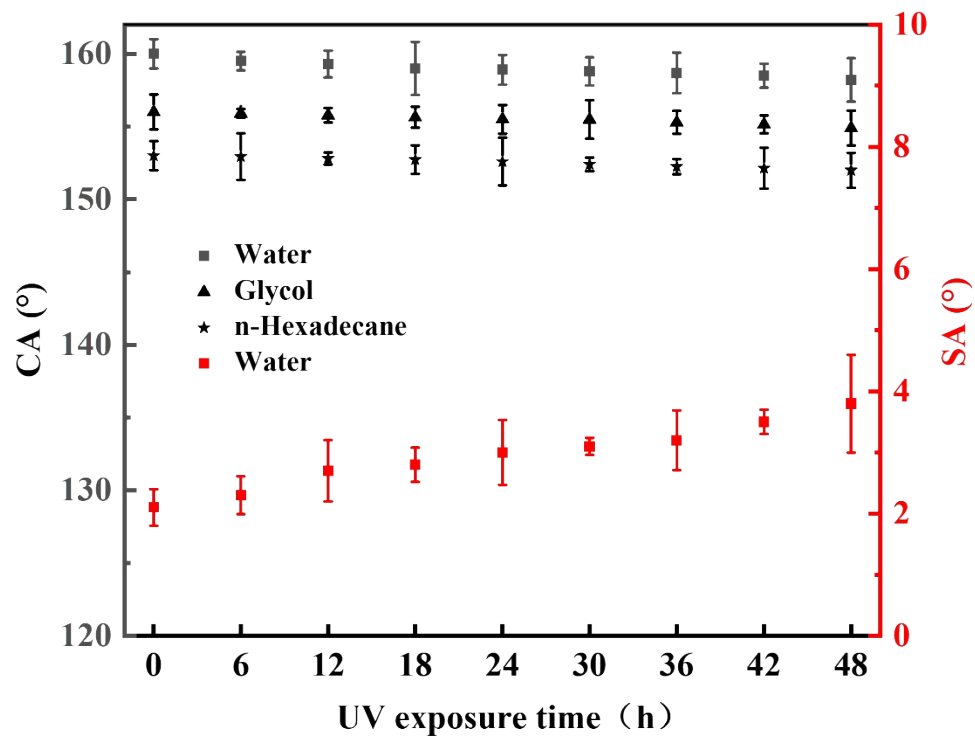

**Figure S10.** Contact angles and slide angle after continuous UV irradiation for 48 h.

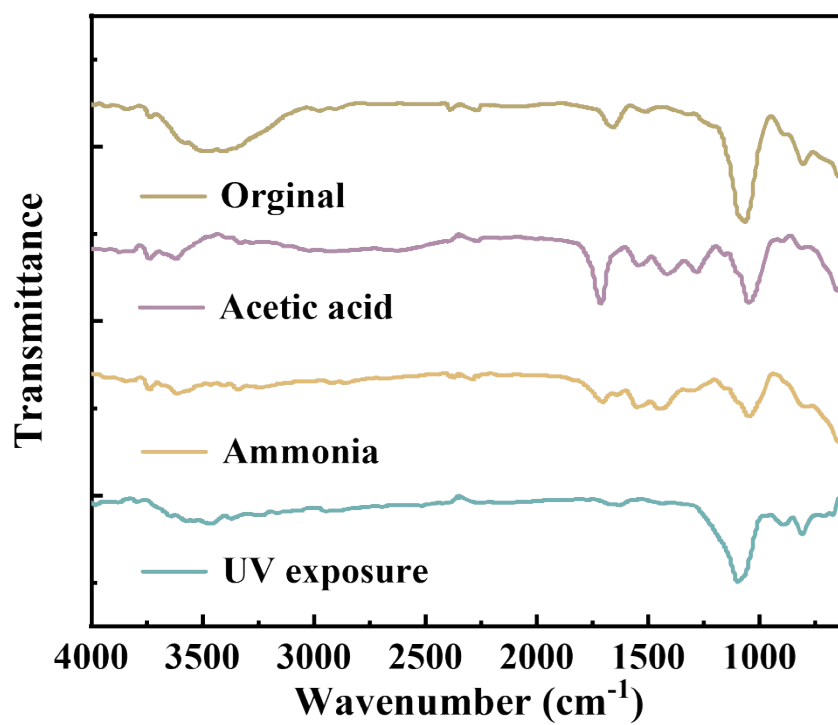

**Figure S11.** FTIR spectra of MSS coating exposed to different environments.

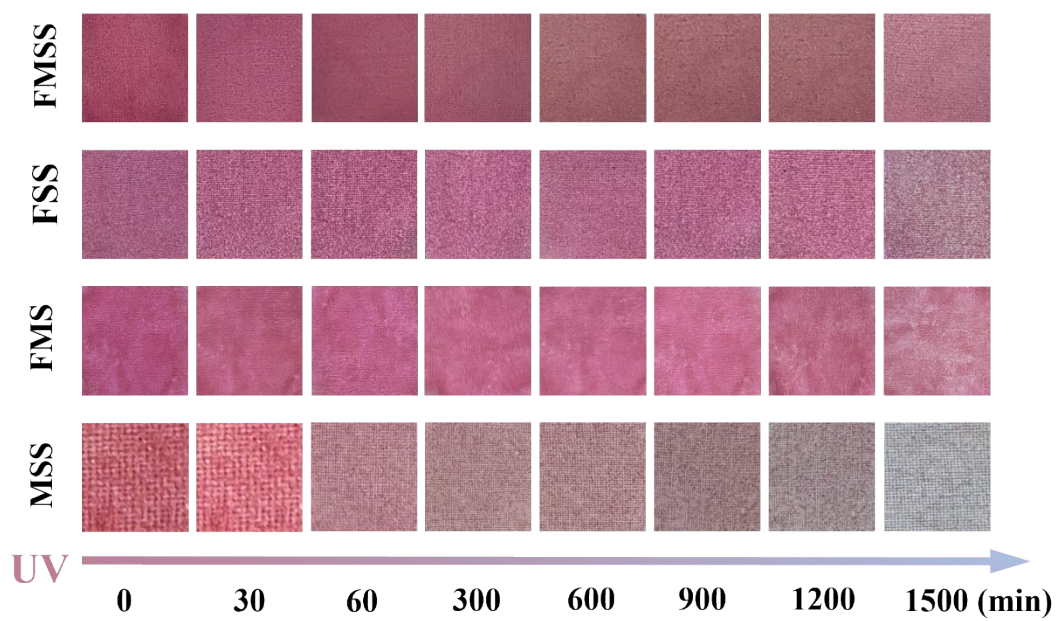

**Figure S12.** Optical photographs of colour change of FMSS, FSS, FMS, MSS coatings after UV irradiation.

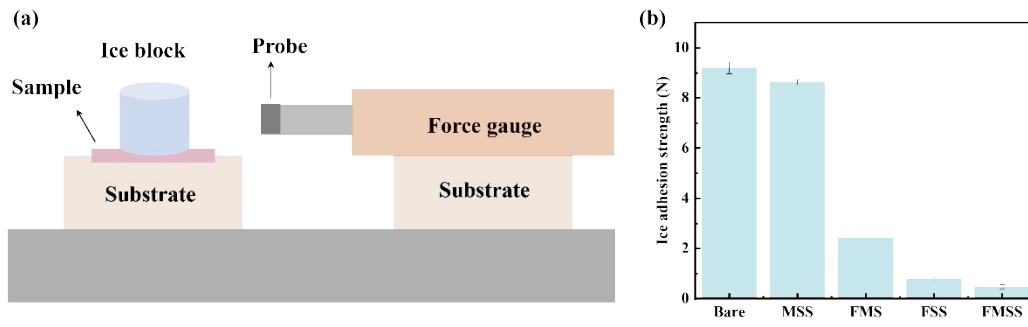

**Figure S13.** (a) Schematic diagram for testing ice adhesion. (b) Diagram for ice adhesion .

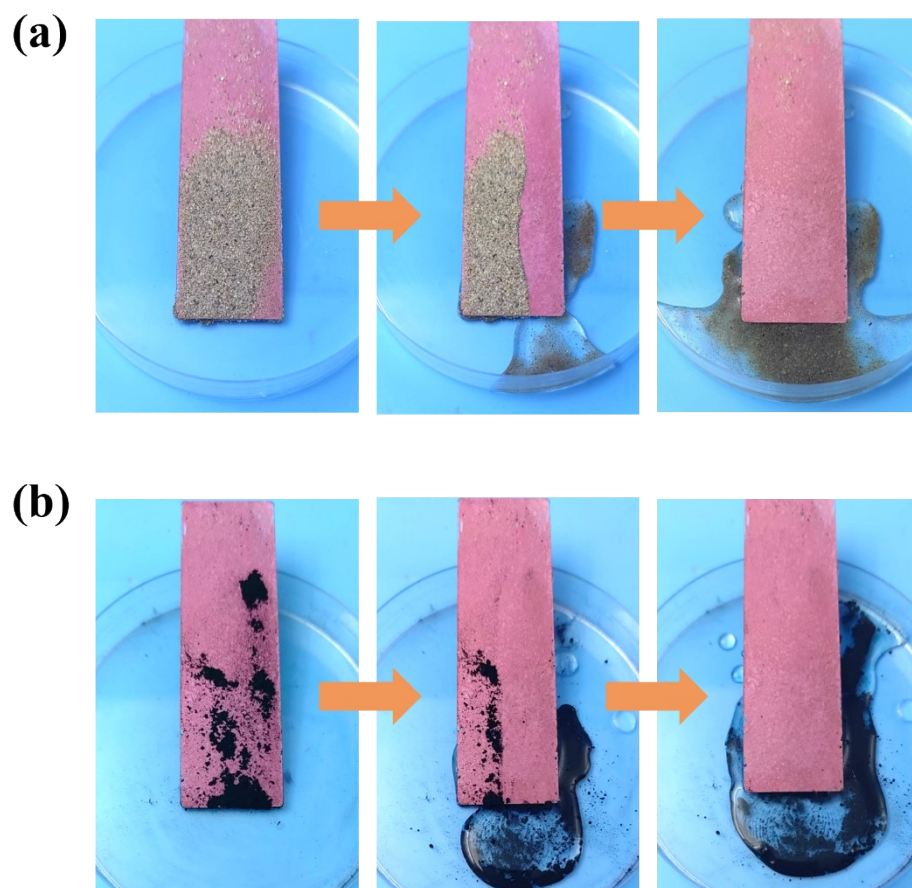

**Figure S14.** Self-cleaning of glycol (a) hydrophobic sand; (b) carbon black.

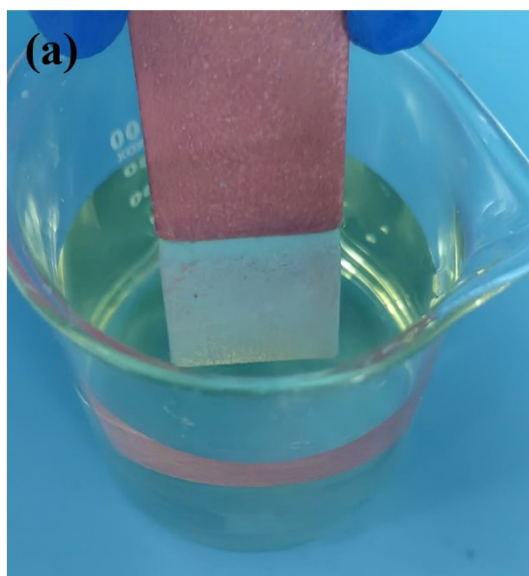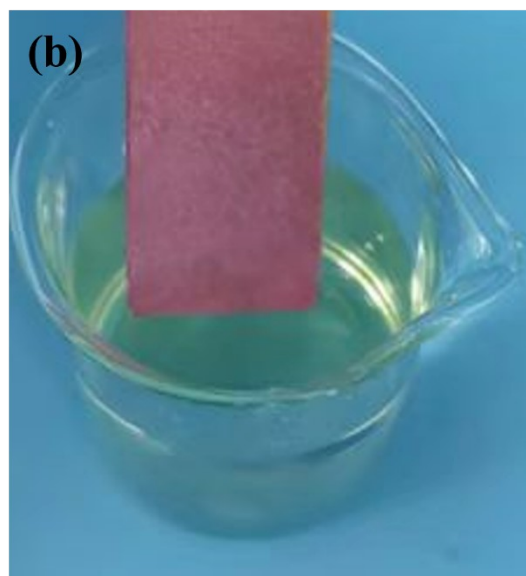

**Figure S15.** Images of the coating before and after immersion in colza oil.

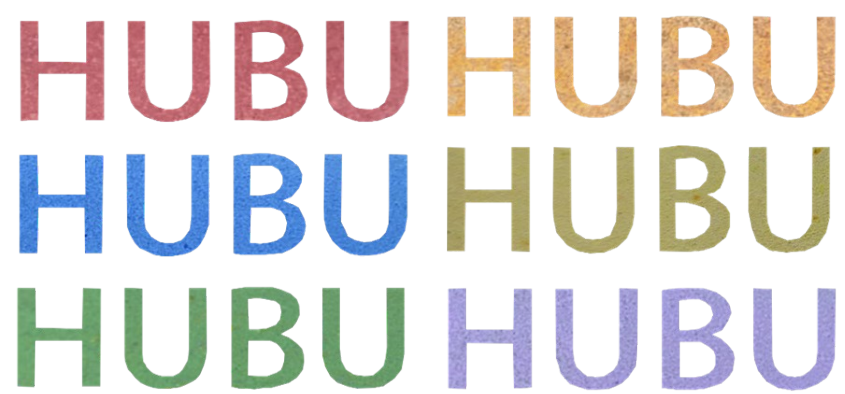

**Figure S16.** Images of colorful superamphiphobic coating sprays different color letters.



**Table S1.** The static contact angle (CA) and slide angle (SA) of drops with different surface tension ( $\gamma$ ) were measured for characterizing the wetting behavior.

| Liquid       | $\gamma$ (mN·m <sup>-1</sup> ) | CA (°)  | SA (°)  |
|--------------|--------------------------------|---------|---------|
| Water        | 72.1                           | 160±1   | 2.1±0.3 |
| Glycerol     | 64                             | 156±1.2 | 4.5±0.5 |
| Glycol       | 47.3                           | 155±1   | N/A     |
| Colza oil    | 32                             | 154±0.5 | N/A     |
| n-Hexadecane | 27.5                           | 153±1   | N/A     |

**Table S2.** Contact angle test of different work after UV irradiation.

| Materials                                                                                                                                                                                                                | UV irradiation time | UV Watt | Water Contact angle | Oil Contact angle | Ref |
|--------------------------------------------------------------------------------------------------------------------------------------------------------------------------------------------------------------------------|---------------------|---------|---------------------|-------------------|-----|
| ABR, Palygorskite and n-hexadecyltrimethoxysilane (HDTMS) and tetraethoxysilane (TEOS)                                                                                                                                   | 0.5 h               | 200 w   | 163.2°±0.7°         | /                 | [1] |
| sodium tungstate dihydrate (Na <sub>2</sub> WO <sub>4</sub> ·2H <sub>2</sub> O), Oxalic acid dihydrate (H <sub>2</sub> C <sub>2</sub> O <sub>4</sub> ·2H <sub>2</sub> O) sodium dodecyl benzene sulfonate (SDBS), PFDTES | 72 h                | 20 w    | 151.2°±0.8°         | 146°±1.6°         | [2] |
| Hollow glass microspheres (HGMs), TiO <sub>2</sub> , octyltriethoxysilane (OTES), tetraethyl orthosilicate (TEOS)                                                                                                        | 96 h                | 8 w     | > 150°              | /                 | [3] |
| Iron nitrate nonahydrate (Fe(NO <sub>3</sub> ) <sub>3</sub> ·9H <sub>2</sub> O) · urea (CO(NH <sub>2</sub> ) <sub>2</sub> ) · sodium dodecyl sulfonate (SDS) ·                                                           | 12 h                | 8 w     | 150°                | /                 | [4] |
| Polydimethylsiloxane (PDMS) pre-polymer (Sylgard 184 Industrial Elastomer Base), Yak hairs                                                                                                                               | 70 h                | /       | > 150°              | /                 | [5] |
| This work                                                                                                                                                                                                                | 48 h                | 40 w    | 157.8°±1.5°         | 154.1°±1.2°       | /   |

**Movie 1** Water jet on the surface of the sample.

- [1] Y. J. Zhang, J. P. Zhang, A. Q. Wang, *J. Mater. Chem. A* **2016**, 4, 901.
- [2] W. Si, S. C. Wang, Z. T. Yu, X. Dai, M. L. Guo, Z. G. Guo, *Chem. Eng. J.* **2024**, 492, 10.
- [3] H. Y. Wu, Y. Y. Wang, S. Liu, C. S. Peng, *J. Mater. Eng. Perform.* **2023**, DOI: 10.1007/s11665-023-09060-412.
- [4] M. K. Wang, Z. Z. Zhang, Y. L. Wang, X. Zhao, M. M. Yang, X. H. Men, Q. J. Xue, *Chem. Eng. J.* **2020**, 384, 7.
- [5] E. Pakdel, W. J. Xie, J. F. Wang, S. Kashi, J. Sharp, Q. Zhang, R. J. Varley, L. Sun, X. G. Wang, *Chem. Eng. J.* **2022**, 433, 13.
